# Supplementary material for: Applications of Extreme Value Theory in Public Health
Source: PubMed Central journal article supplement (PMC4946775; doi:10.1371/journal.pone.0159312), 2016-07-15
Supplement: pone.0159312.s001.pdf [file pone.0159312.s001.pdf]

Weekly Increments of Entries in Emergency Rooms

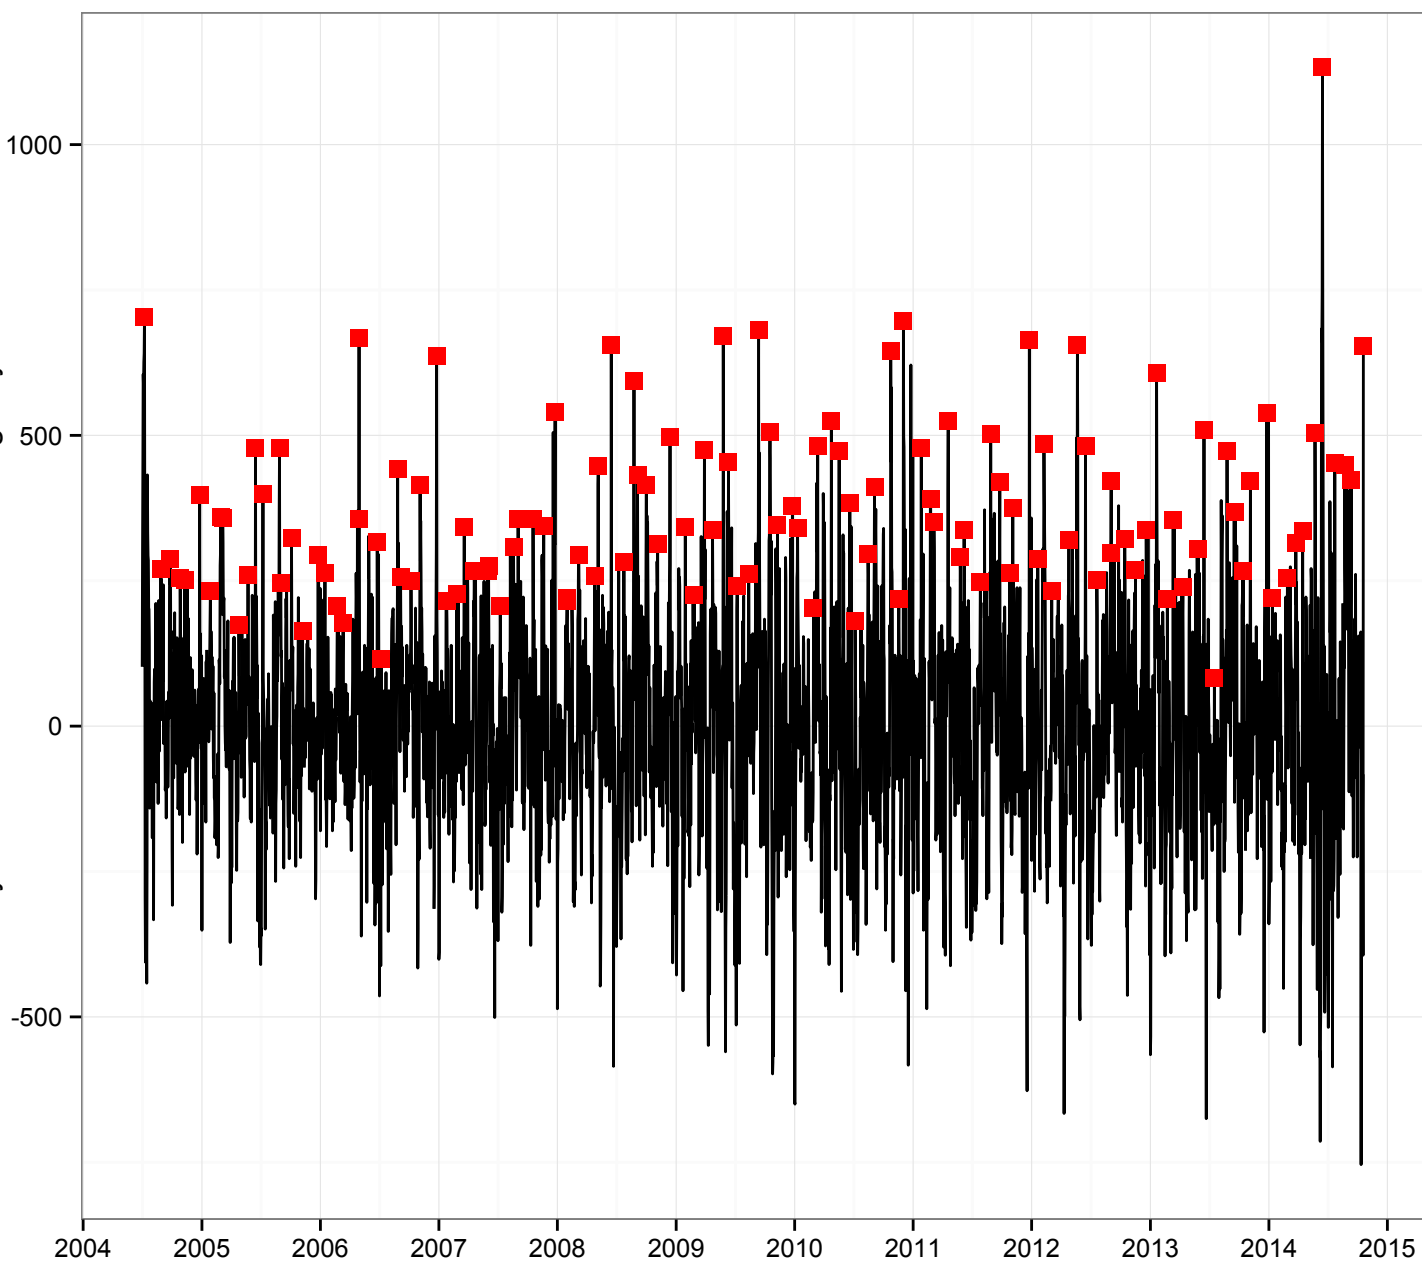

Maximum of Increments
