# Supplementary material for: Applications of Extreme Value Theory in Public Health
Source: PubMed Central journal article supplement (PMC4946775; doi:10.1371/journal.pone.0159312), 2016-07-15

a-Observed and Fitted distributions

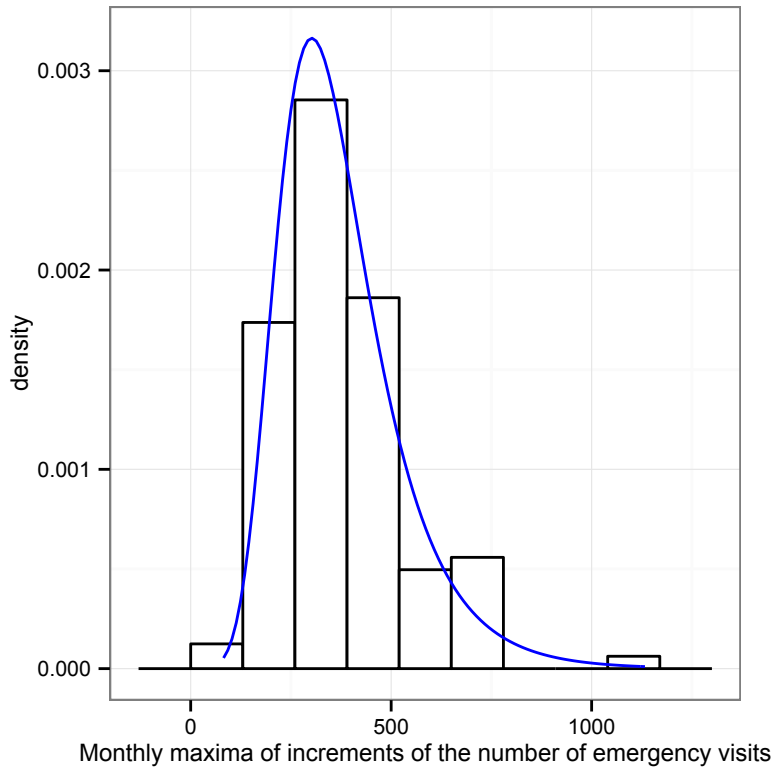

b-Quantile-Quantile plot

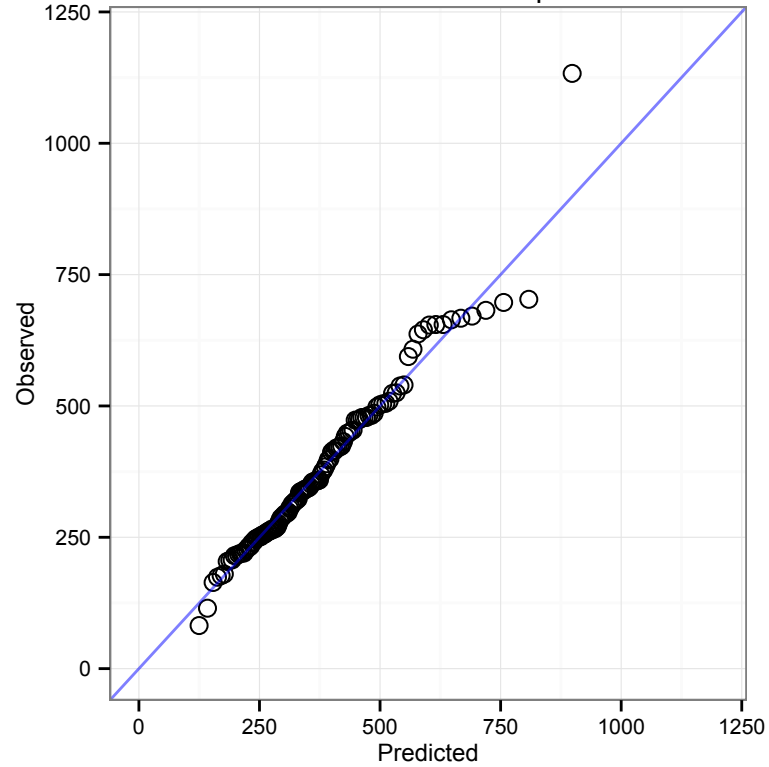

c-Return Level Plot

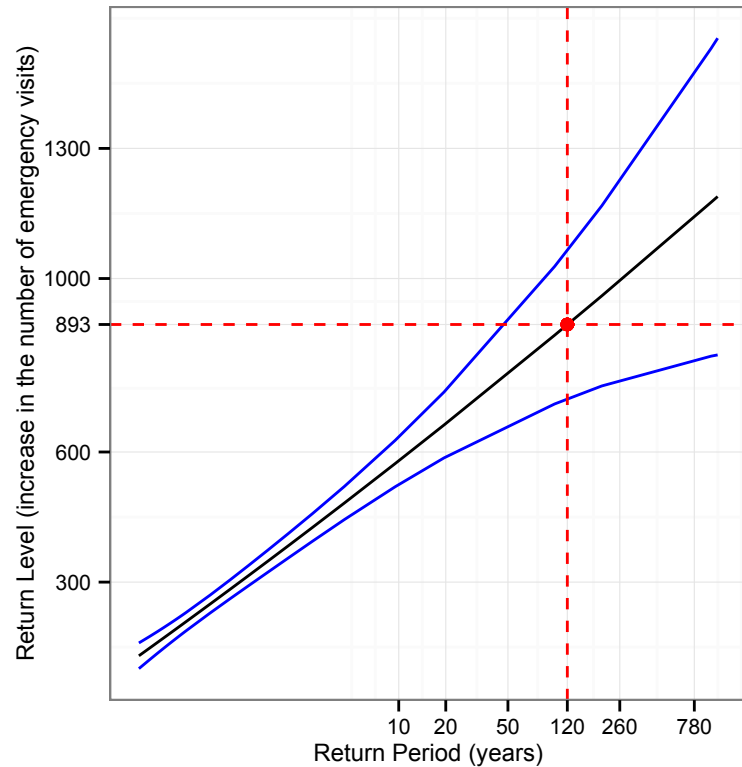

Supplement: pone.0159312.s002.pdf [file pone.0159312.s002.pdf]
